# Supplementary material for: Monounsaturated fatty acids, olive oil and health status: a systematic review and meta-analysis of cohort studies
Source: Springer Nature journal article supplement (doi:10.1186/1476-511x-13-154), 2014-10-01

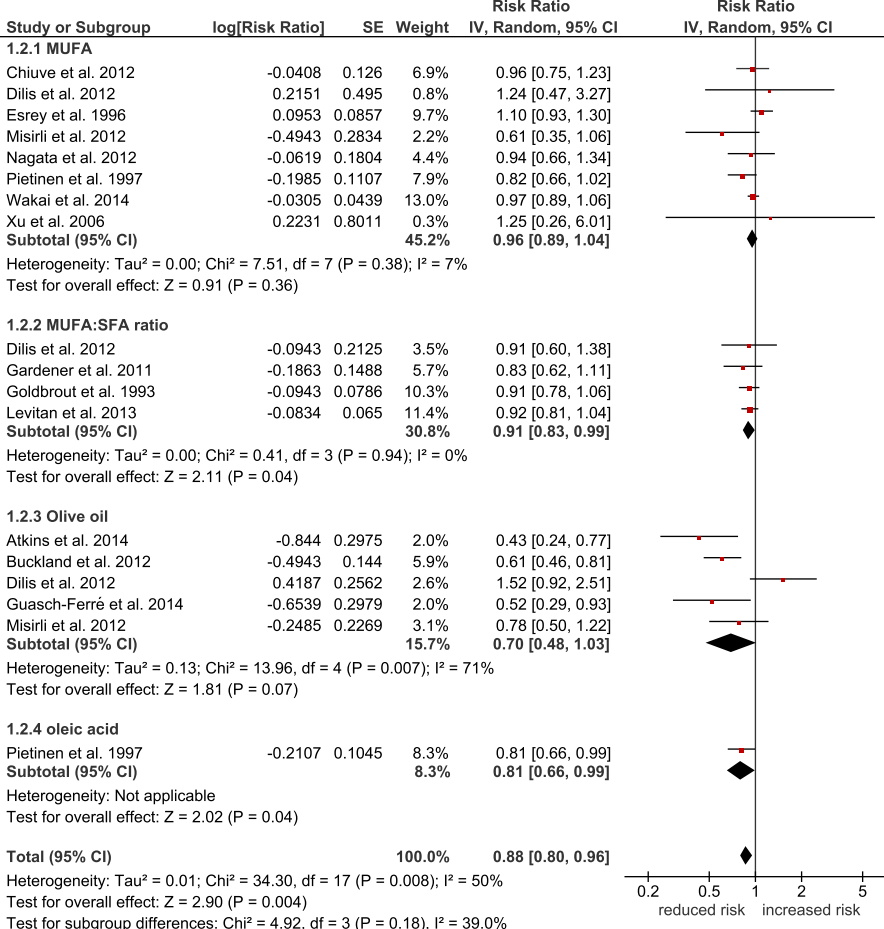

Supplement: 12944_2014_1138_MOESM3_ESM.pdf [file 12944_2014_1138_MOESM3_ESM.pdf]
